# Supplementary material
Source: Springer Nature journal article supplement (https://www.springermedizin.de/resource/supplementary/13046_2010_415_MOESM1_ESM.pdf/9661974)
Supplement: MOESM1 [file 9661974]

| <b>Authors</b>       | <b>Title</b>                                                                                                                                                                  | <b>Journal</b>                                | <b>Year</b> | <b>Vol.<br/>Issue</b> | <b>Pag.</b>   | <b>IF</b> | <b>PMID</b> | <b>DOI</b>                 | <b>URL</b>                        |
|----------------------|-------------------------------------------------------------------------------------------------------------------------------------------------------------------------------|-----------------------------------------------|-------------|-----------------------|---------------|-----------|-------------|----------------------------|-----------------------------------|
| Di Biase<br>L et al. | Antiarrhythmic effect of reverse ventricular remodeling induced by cardiac resynchronization therapy the InSync ICD (Implantable Cardioverter-Defibrillator) Italian registry | Journal of the American College of Cardiology | 2008        | 52<br>(18)            | 1442-<br>1449 | 11.438    | 19017510    | 10.1016/j.jacc.2008.07.043 | <a href="http://..">http://..</a> |
